# Supplementary material
Source: Elsevier journal article supplement (https://www.sciencedirect.com/science/article/pii/S0001651921000418)
Supplement: mmc1 [file S0001651921000418:mmc1.pdf]

# DOCUMENTO DE CONSENSO SOBRE EL USO DE COLGAJOS E INJERTOS ENDONASALES EN CIRUGÍA ENDOSCÓPICA NASOSINUSAL Y DE BASE DE CRÁNEO. (1ª RONDA)

Método Delphi

**\*Obligatorio**

## 1. Dirección de correo electrónico \*

---

### Documento Consenso. Aclaraciones

El DOCUMENTO DE CONSENSO SOBRE EL USO DE COLGAJOS E INJERTOS ENDONASALES EN CIRUGÍA ENDOSCÓPICA NASOSINUSAL Y DE BASE DE CRÁNEO se llevará a cabo mediante un método Delphi con varias RONDAS de preguntas (carácter anónimo), a través de un FORMULARIO de GOOGLE.

El OBJETIVO de la 1ª RONDA será responder una serie de preguntas. Se habilitará la posibilidad de realizar los COMENTARIOS LIBRES o ACLARACIONES que se consideren oportunas.

Tras realizar la 1ª RONDA, los resultados y los COMENTARIOS LIBRES serán analizados e incorporados a un informe. Este informe será compartido con todos los participantes en el DOCUMENTO DE CONSENSO.

Posteriormente se realizará una 2ª RONDA de preguntas con un FORMULARIO revisado, utilizando la misma metodología, .

El número de RONDAS vendrá determinado por el grado de CONSENSO/ACUERDO alcanzado en cada una de ellas.

Se considerará un CONSENSO AMPLIO a partir del 80-90% de CONSENSO/ACUERDO en las respuestas. Habitualmente con 2-3 RONDAS se suele alcanzar el objetivo.

### 1ª RONDA DE PREGUNTAS

El OBJETIVO de esta 1ª RONDA es responder de la manera GENERAL. En los COMENTARIOS LIBRES se podrán realizar las ACLARACIONES que se consideren oportunas en relación al tema preguntado.

2. 1.1- La presencia de una fístula de LCR es el aspecto más relevante a la hora de utilizar colgajos e injertos endonasales en Cirugía Endoscópica Endonasal Expandida (CEEE). \*

*Marca solo un óvalo.*

☐ SI

☐ No

3. 1.2 COMENTARIO LIBRE (las consideraciones que realice serán incluidas en la 2ª Ronda).

---

---

---

---

---

4. 2.1-El Colgajo Nasoseptal (CNS) se utiliza para el cierre quirúrgico en la CEEE en presencia de fístulas de LCR de BAJO flujo. \*

*Marca solo un óvalo.*

☐ SI

☐ No

5. 2.2 COMENTARIO LIBRE (las consideraciones que realice serán incluidas en la 2ª Ronda).

---

---

---

---

---

6. 2.3-El CNS se utiliza para el cierre quirúrgico en la CEEE en presencia de fístulas de LCR de ALTO flujo. \*

*Marca solo un óvalo.*

☐ SI

☐ No

7. 2.4 COMENTARIO LIBRE (las consideraciones que realice serán incluidas en la 2ª Ronda).

---

---

---

---

---

8. 3.1 El CNS extendido es una alternativa al CNS y es útil en los casos de fístulas de LCR postoperatoria, fundamentalmente en los abordajes del límite posterior (clivales), aunque también pueden cubrir grandes defectos en la base de cráneo anterior. \*

*Marca solo un óvalo.*

☐ SI

☐ No

9. 3.2 COMENTARIO LIBRE (las consideraciones que realice serán incluidas en la 2ª Ronda).

---

---

---

---

---

10. 4.1 El colgajo de rescate o "Rescue Flap" está indicado en la mayoría de los corredores endonasales de base de cráneo anterior y/o media, ya que disminuye la morbilidad nasal si finalmente no es necesario el uso del CNS. \*

*Marca solo un óvalo.*

☐ SI

☐ No

11. 4.2 COMENTARIO LIBRE (las consideraciones que realice serán incluidas en la 2ª Ronda).

---

---

---

---

---

12. 5.1 EL colgajo vascularizado de Cornete Medio (CM) está indicado fundamentalmente para el cierre de fístulas de LCR de bajo flujo localizadas en la región etmoidal. \*

*Marca solo un óvalo.*

☐ SI

☐ No

13. 5.2 OTRAS INDICACIONES del Colgajo de CM:

*Selecciona todos los que correspondan.*

- ☐ FÍSTULAS DE LCR DE LA REGIÓN FRONTOETMOIDAL
- ☐ FÍSTULAS DE LCR DE LA REGIÓN ETMOIDAL POSTERIOR
- ☐ FÍSTULAS DE LCR DEL PLANUM ESFENOIDAL
- ☐ FÍSTULAS DE LCR TRANSTUBERCULAR

14. 5.3 COMENTARIO LIBRE (las consideraciones que realice serán incluidas en la 2ª Ronda).

---

---

---

---

---

15. 6.1 El colgajo de Cornete Inferior y el Colgajo pediculado Posterolateral (C-H flap) son útiles para el tratamiento de las fístulas de LCR postoperatorias, en caso de CNS no viable, entre otras indicaciones. \*

*Marca solo un óvalo.*

☐ SI

☐ No

16. 6.2 INDICACIONES del colgajo de Cornete Inferior y el Colgajo pediculado Posterolateral (C-H flap). \*

*Selecciona todos los que correspondan.*

- ☐ Perforaciones septales amplias
- ☐ Defectos óseos (SIN fístula de LCR)
- ☐ Fístulas de LCR localizadas en la región clival
- ☐ Fístulas de LCR transplanum/ transtuberculum
- ☐ Fístulas de LCR en región etmoidal

17. 6.3 COMENTARIOS (las consideraciones que realice serán incluidas en la 2ª Ronda).

---

---

---

---

---

18. 7.1 El colgajo de la Arteria Etmoidal Anterior (AEA) es un recurso eficaz en el tratamiento de las perforaciones septales anteriores menores de 2-3 cm. \*

*Marca solo un óvalo.*

☐ SI

☐ NO

19. 7.2 Otras INDICACIONES del Colgajo de AEA. \*

*Selecciona todos los que correspondan.*

- ☐ Fístulas de LCR de etmoides anterior
- ☐ Fístulas de LCR de pared posterior de seno frontal
- ☐ Fístulas de LCR de etmoides posterior
- ☐ Fístulas de LCR de planum esfenoidal

20. 7.3 Colgajo de AEA. Comentarios (las consideraciones que realice serán incluidas en la 2ª Ronda).

---

---

---

---

---

21. 8.1 El Colgajo de Pericráneo y el Colgajo pediculado Ántero Lateral (HB2), son útiles en caso de fístulas de LCR de base de cráneo anterior y CNS no viable. \*

*Marca solo un óvalo.*

☐ Si

☐ No

22. 8.2 INDICACIONES del Colgajo de Pericráneo. (las consideraciones que realice serán incluidas en la 2ª Ronda).

---

---

---

---

---

23. 8.3 INDICACIONES del Colgajo de HB2. (las consideraciones que realice serán incluidas en la 2ª Ronda).

---

---

---

---

---

24. 9. Los injertos libres de mucosa nasal son una alternativa en caso de fístulas de bajo flujo en CEEE. \*

*Marca solo un óvalo.*

☐ SI

☐ No

25. 9.2 Seleccione del injerto libre de mucosa nasal que considere más útil (Consistencia / Dimensiones / Homogeneidad / Morbilidad) para el sellado de fístulas de bajo flujo o defectos óseos. \*

*Selecciona todos los que correspondan.*

- ☐ Injerto de Cornete Medio
- ☐ Injerto libre de Cornete inferior
- ☐ Injerto libre de suelo nasal
- ☐ Injerto libre de septum nasal

26. 9.3 Comentarios sobre los distintos injertos libres de mucosa nasal (las consideraciones que realice serán incluidas en la 2ª Ronda).

---

---

---

---

---

---

Este contenido no ha sido creado ni aprobado por Google.

Google Formularios
