# Supplementary material
Source: Elsevier journal article supplement (https://www.sciencedirect.com/science/article/pii/S0001651921000418)
Supplement: mmc2 [file S0001651921000418:mmc2.pdf]

# DOCUMENTO DE CONSENSO SOBRE EL USO DE COLGAJOS E INJERTOS ENDONASALES EN CIRUGÍA ENDOSCÓPICA NASOSINUSAL Y DE BASE DE CRÁNEO. (2ª RONDA)

Método Delphi

**\*Obligatorio**

1. Dirección de correo electrónico \*

---

2. 1.1-En caso de fístulas de BAJO FLUJO y un defecto de <1 cm localizado en pared posterior de seno frontal, ¿qué recurso de cierre utilizarías para sellarlo?. En caso de seleccionar varias alternativas, ordene su elección por prioridad de uso, en el apartado de comentarios. \*

*Selecciona todos los que correspondan.*

- ☐ Injerto libre de mucosa nasal (CM, CI, Septum o Suelo)
- ☐ Colgajo Nasoseptal (CNS)
- ☐ Colgajo de HADAD II
- ☐ Colgajo Pericraneal
- ☐ Colgajo de Arteria Etmoidal Anterior
- ☐ Otros (escribirlo en comentarios)

3. 1.2 COMENTARIOS

---

---

---

---

---

4. 2.1- En caso de fístulas de ALTO FLUJO y un defecto de pared posterior de seno frontal, ¿qué recurso de cierre utilizarías para sellar? En caso de seleccionar varias alternativas, ordene su elección por prioridad de uso, en el apartado de comentarios. \*

*Selecciona todos los que correspondan.*

- ☐ Injerto libre de mucosa nasal (CM, CI, Septum o Suelo)
- ☐ Colgajo Nasoseptal (CNS)
- ☐ Colgajo de HADAD II
- ☐ Colgajo Pericraneal
- ☐ Colgajo de Arteria Etmoidal Anterior
- ☐ Otros (escribirlo en comentarios)

5. 2.2 COMENTARIOS

---

---

---

---

---

6. 3.1 En caso de defecto en la región etmoidal con una fístula de LCR bajo flujo y CNS viable (por ejemplo: en caso de fístula iatrógena en fóvea etmoidal durante la realización de una CENS por Poliposis Nasal), ¿qué recurso utilizarías como primera opción? ¿Y como segunda? (en caso de fallo en el sellado de la primera opción). \*

*Marca solo un óvalo.*

- ☐ 1ª Colgajo de cornete medio (CCM). 2ª Colgajo Nasoseptal (CNS)
- ☐ 1ª CNS. 2ª CCM
- ☐ 1ª Injerto libre de mucosa nasal (CM, CI, Septum o Suelo). 2ª CNS
- ☐ 1ª Injerto libre de mucosa nasal (CM, CI, Septum o Suelo). 2ª CCM
- ☐ Otra combinación (escribirla en comentarios)

## 7. 3.2 COMENTARIOS

---

---

---

---

---

8. 4.1 En caso de fístulas de BAJO FLUJO y ausencia de CNS viable, ¿qué recurso de cierre utilizarías para sellar un defecto selar? En caso de seleccionar varias alternativas, ordene su elección por prioridad de uso, en el apartado de comentarios. \*

*Selecciona todos los que correspondan.*

- ☐ Injerto libre de mucosa nasal (CM, CI, Septum o Suelo)
- ☐ Colgajo de HADAD II
- ☐ Colgajo Pericraneal
- ☐ Colgajo de Carrau-Hadad o el Colgajo Nasal Postero Lateral
- ☐ Colgajo de Arteria Etmoidal Anterior
- ☐ Otros (escribirlo en comentarios)

## 9. 4.2 COMENTARIOS

---

---

---

---

---

10. 5.1 En caso de fístulas de LCR y ausencia de CNS viable, ¿qué recurso de cierre utilizarías para sellar un defecto clival? En caso de seleccionar varias alternativas, ordene su elección por prioridad de uso, en el apartado de comentarios. \*

*Selecciona todos los que correspondan.*

- ☐ Injerto libre de mucosa nasal (CM, CI, Septum o Suelo)
- ☐ Colgajo Pericraneal
- ☐ Colgajo de Carrau-Hadad o el Colgajo Nasal Postero Lateral
- ☐ Colgajo de Arteria Etmoidal Anterior
- ☐ Otros (escribirlo en comentarios)

11. 5.2 COMENTARIOS

---

---

---

---

---

---

Este contenido no ha sido creado ni aprobado por Google.

Google Formularios
